# Supplementary material
Source: PubMed Central journal article supplement (PMC4704868)
Supplement: NIHMS732732-supplement-Supplement.pdf [file NIHMS732732-supplement-Supplement.pdf]

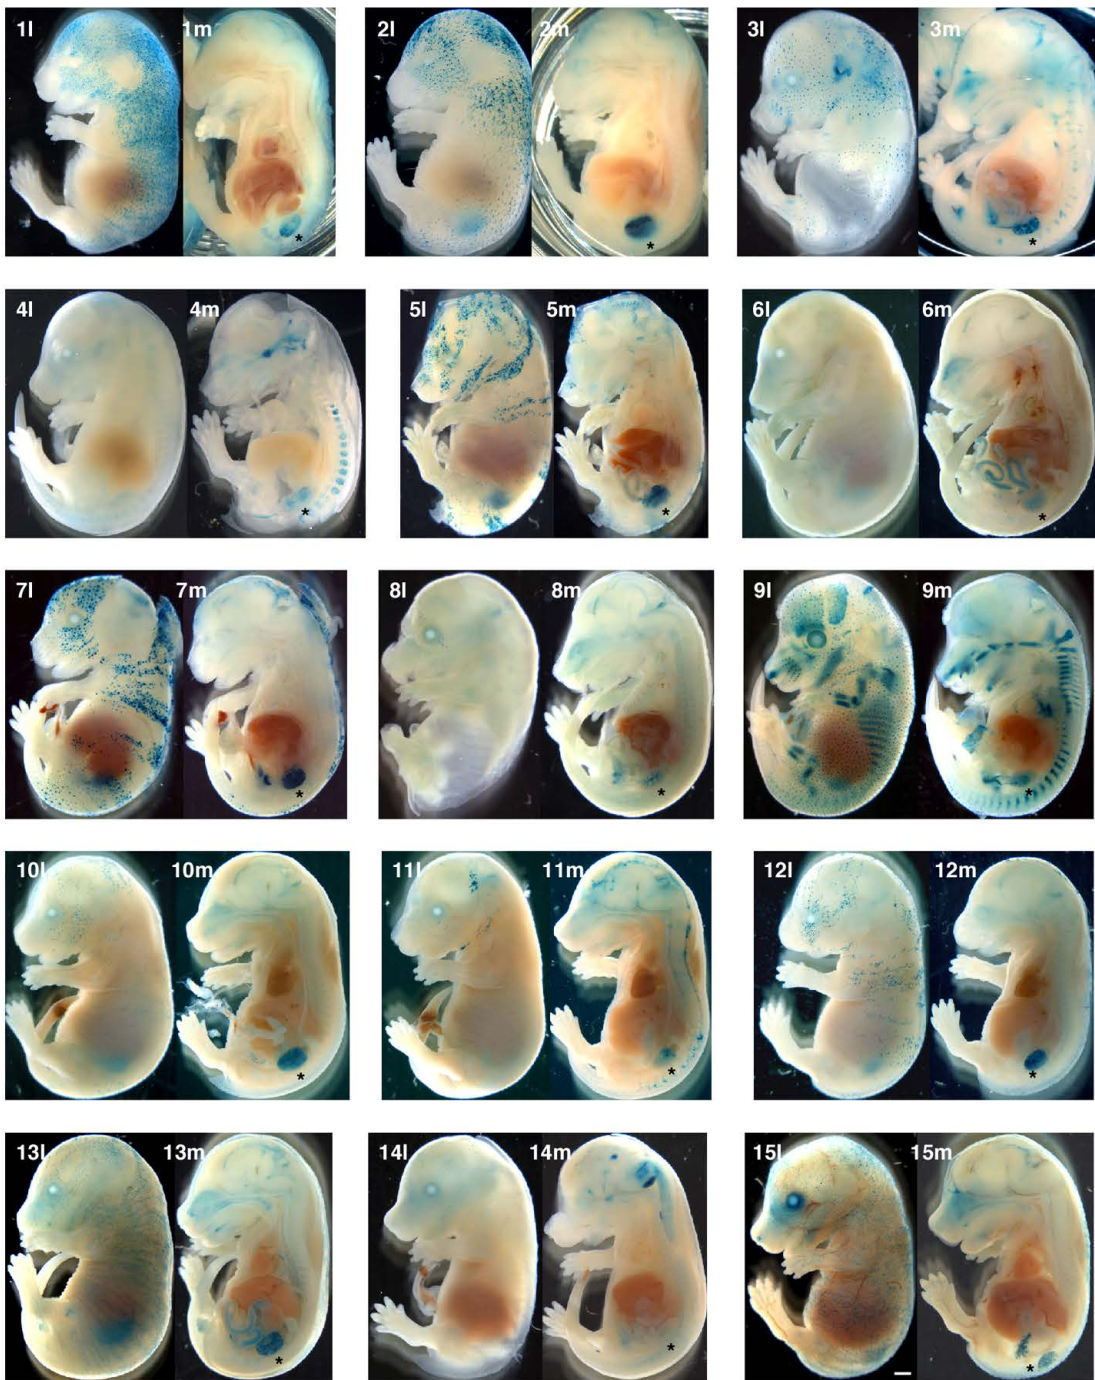

**Supplementary Figure 1. H2 transgenic embryos.** Fifteen transgenic embryos produced by pronuclear injection of the 6.7 kb H2 plasmid are shown. Each embryo represents an independent genomic integration event. Embryos were collected at E16.5, stained for *lacZ* activity, and bisected before imaging to show both external lateral (l) and internal medial (m) expression patterns. The skin (N=13) and kidney (N=14) were consistent sites of expression. The asterisk denotes the position of the kidney in the internal images. Scale bar, 1 mm.

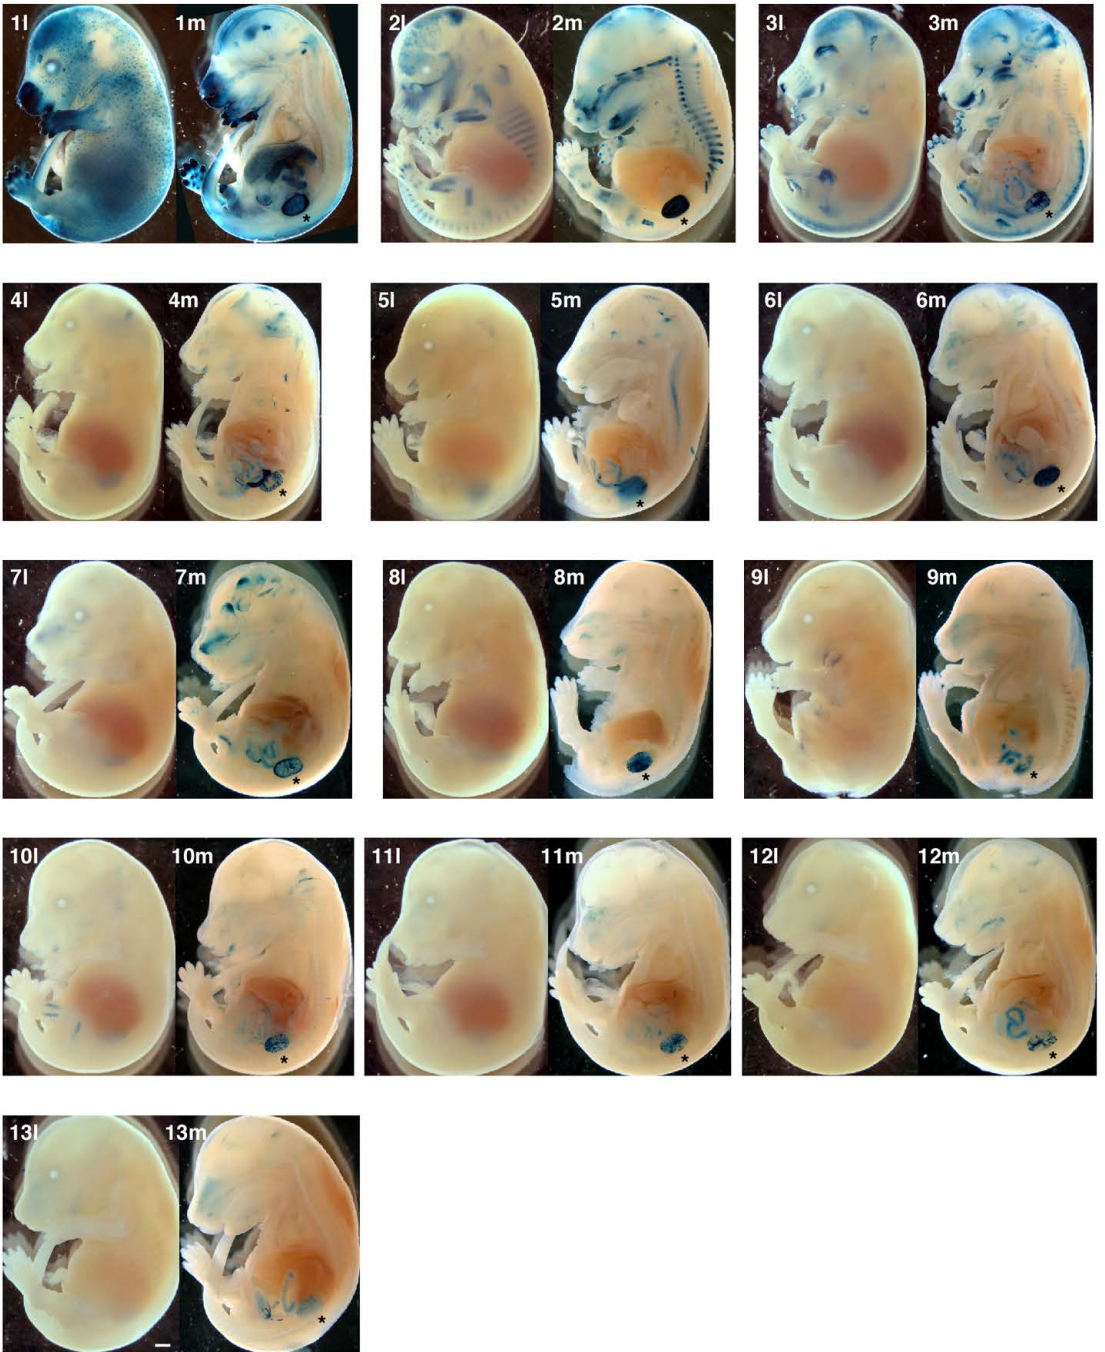

**Supplementary Figure 2. H2b transgenic embryos.** Thirteen transgenic embryos produced by pronuclear injection of the 1.5 kb H2b plasmid are shown. Each embryo represents an independent genomic integration event. Embryos were collected at E16.5, stained for *lacZ* activity, and bisected before imaging to show both external lateral (l) and internal medial (m) expression patterns. The kidney (N=12) was the only consistent site of expression. The asterisk denotes the position of the kidney in the internal images. Scale bar, 1 mm.



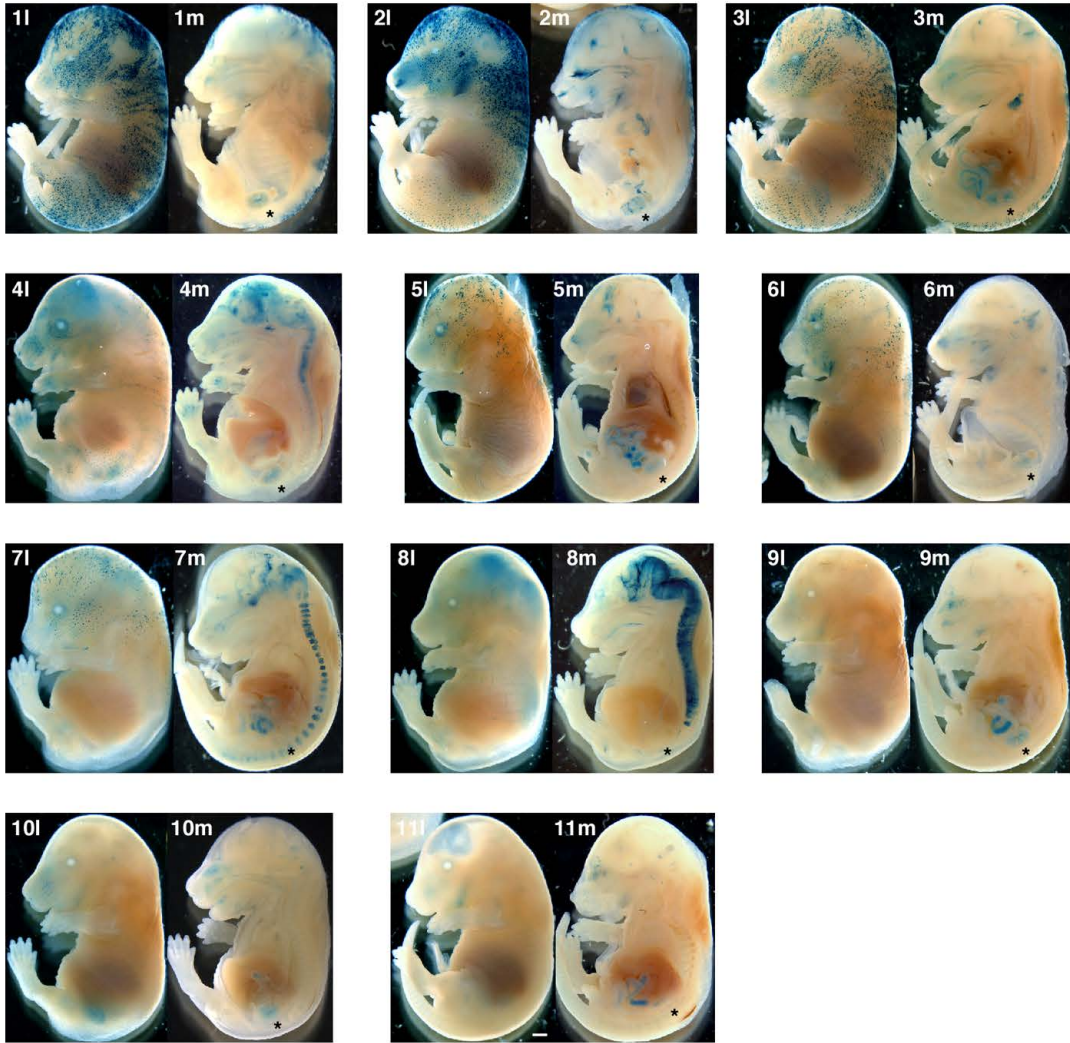

**Supplementary Figure 3. HFE transgenic embryos.** Eleven transgenic embryos produced by pronuclear injection of the 1.9 kb HFE clone are pictured. Each embryo represents an independent genomic integration event. Embryos were collected at E16.5, stained for *lacZ* activity, and bisected before imaging to show both external lateral (l) and internal medial (m) expression patterns. Hair/skin expression was visible in 8 of the 11 embryos. The asterisk denotes the position of the kidney in the internal images. Scale bar, 1 mm.

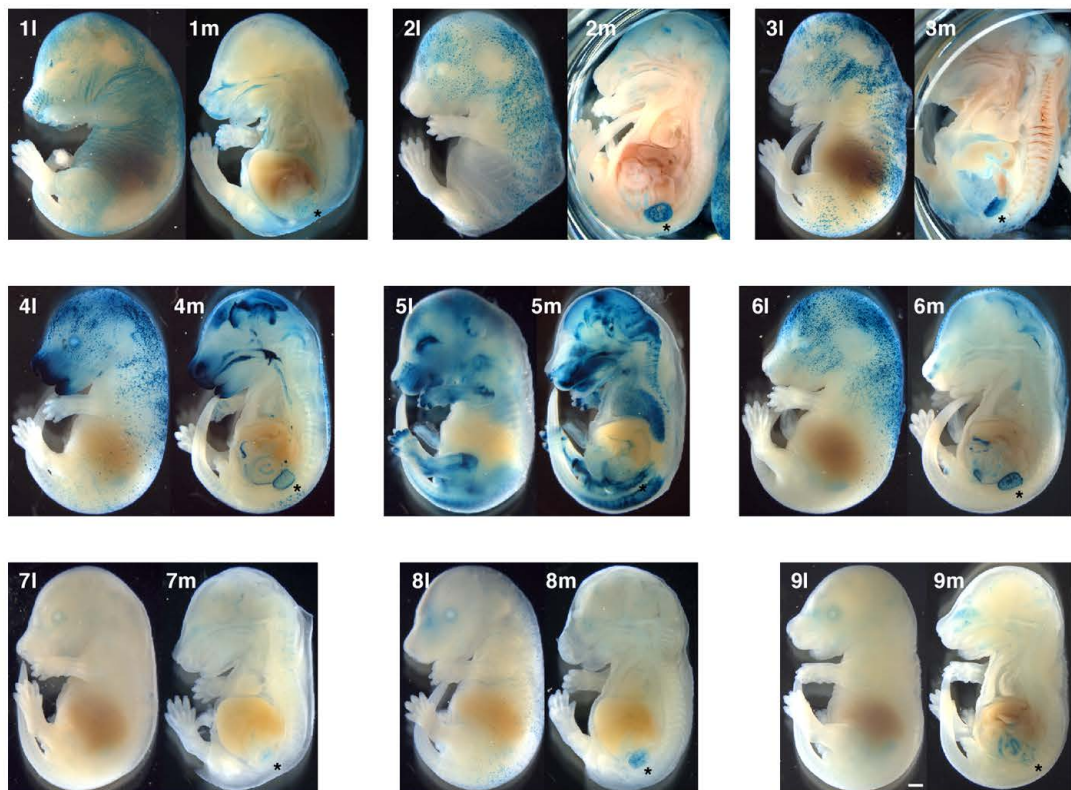

**Supplementary Figure 4. H2-BLD transgenic embryos.** Nine transgenic embryos produced by pronuclear injection of the 6.7 kb H2-BLD plasmid are shown. Each embryo represents an independent genomic integration event. Embryos were collected at E16.5, stained for *lacZ* activity, and bisected before imaging to show both external lateral (l) and internal medial (m) expression patterns. Hair/skin (N=7) and kidney (N=7) were consistent sites of expression. No clear difference in expression compared to the complete set of H2 (=H2-ANC) transgenic embryos was evident (see Supplementary Fig. 1). The asterisk denotes the position of the kidney in the internal images. Scale bar, 1 mm.

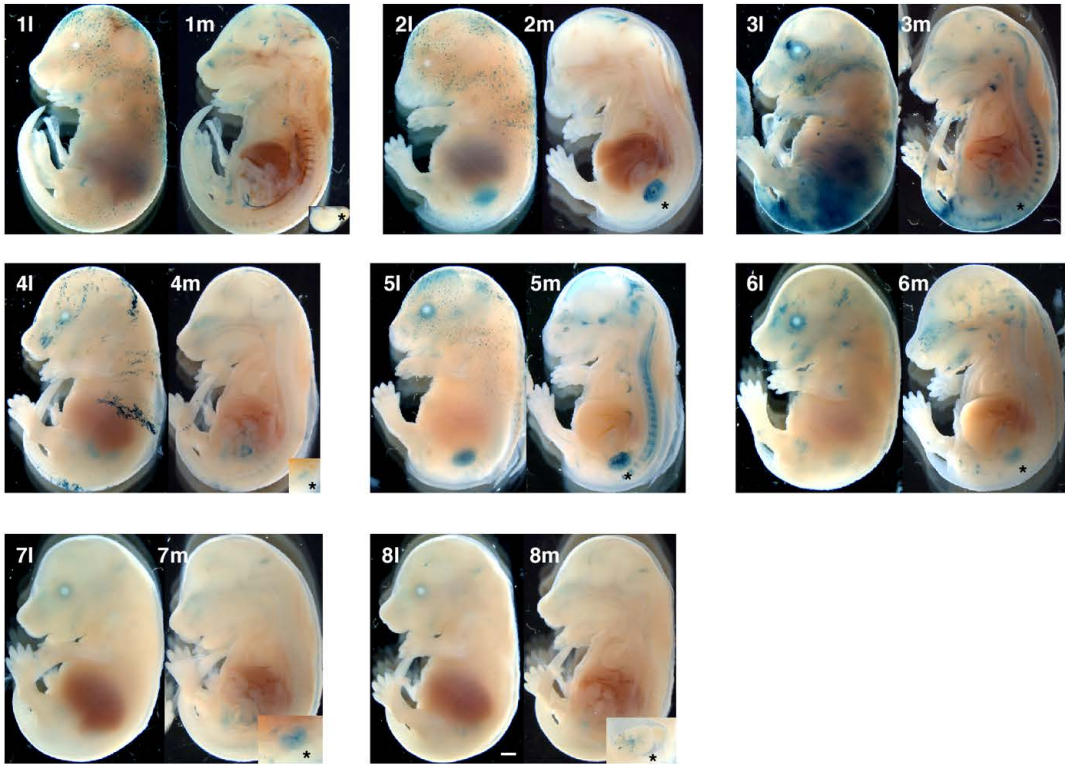

**Supplementary Figure 5. H2-DEL transgenic embryos.** Eight transgenic embryos produced by pronuclear injection of the 6.7 kb H2-DEL plasmid are shown. Each embryo represents an independent genomic integration event. Embryos were collected at E16.5, stained for *lacZ* activity, and bisected before imaging to show both external lateral (l) and internal medial (m) expression patterns. Seven of the embryos show hair/skin expression. However the strength of this staining appeared reduced compared to H2-ANC and H2-BLD embryos, particularly in animals that showed comparably strong kidney expression (such as embryos # 2 and #5). The asterisk denotes the position of the kidney in the internal images. Scale bar, 1 mm.



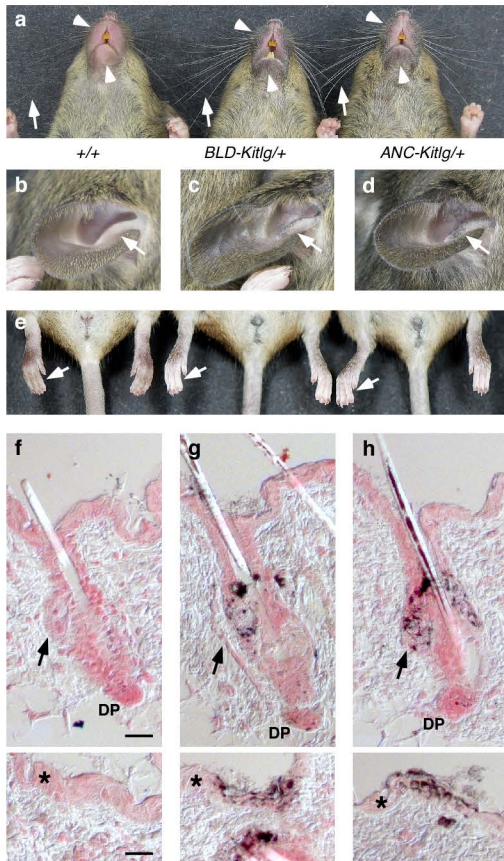

**Supplementary Figure 6. Additional pigmentation phenotypes seen in hair enhancer-Kitlg mice.** *BLD-Kitlg/+* and *ANC-Kitlg/+* heterozygotes exhibit several altered pigmentation patterns compared to wild type (FVB/C57BL/6J F1 hybrid) littermates. At 2 months, ectopic pigmentation is seen on the muzzles (arrowheads in **a**) and the epithelium of the antitragus and ear canal (arrows in **b-d**). In contrast, *BLD-Kitlg/+* and *ANC-Kitlg/+* heterozygotes show reduced pigmentation in the whiskers (arrows in **a**), and the hair on the digits (arrows in **e**), perhaps because of competitive interactions between body sites for melanocyte colonization and development<sup>48</sup> or premature differentiation of migrating melanocytes<sup>49</sup>. (**f-h**) 6  $\mu$ m cross-sections through dorsal skin from 2-month-old (**f**) wild type, (**g**) *BLD-Kitlg/+*, and (**h**) *ANC-Kitlg/+* heterozygotes counterstained with nuclear fast red. Elevated *Kitlg* expression controlled by both the BLD and ANC hair enhancers leads to ectopic pigmentation of the bulge region of hair follicles (arrows) and the basal epidermis (asterisks). DP, dermal papilla. Scale bars, 30  $\mu$ m.

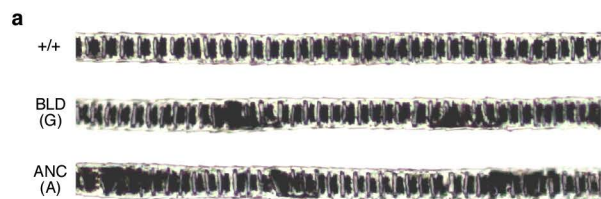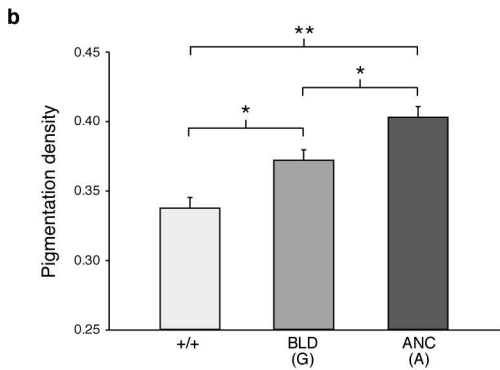

**Supplementary Figure 7. Analysis of pigment levels in zigzag hairs from site-specific transgenic mice.**

**(a)** Photographs of zigzag hairs from wild type (+/+; FVB/C57Bl6/J F1 hybrid), BLD (*BLD-Kitlg/+*) line 2, and ANC (*ANC-Kitlg/+*) line 2 heterozygotes at P21. Fifteen hairs per animal were analyzed to determine the fraction of pigmented pixels per hair shaft. **(b)** Mean pigmentation density in different genotypes. Both *BLD-Kitlg/+* and *ANC-Kitlg/+* heterozygotes exhibit significantly higher levels of pigmentation than wild type controls. Notably, the amount of pigment in *BLD-Kitlg/+* heterozygotes is also significantly less than is found in *ANC-Kitlg/+* heterozygotes ( $P=0.0278$ ). Error bars indicate s.e.m. Unpaired t test values; \*  $P<0.05$ , \*\*  $P<5\times 10^{-3}$ .

**Supplementary Table 1. LEF1 binding results from the Universal PBM Resource for Oligonucleotide Binding Evaluation (UniPROBE).**

| <b>Sequence</b> | <b>Experimental Oligonucleotide</b> | <b>Z-score Exp1</b> | <b>Z-score Exp2</b> | <b>P-value (combined)</b> |
|-----------------|-------------------------------------|---------------------|---------------------|---------------------------|
| LEF consensus   | CATCAAAG                            | 18.59               | 5.66                | 0.0000                    |
| Ancestral       | C <u>A</u> CTAAAG                   | 3.04                | 1.18                | 0.0024                    |
| Blond variant   | C <u>G</u> CTAAAG                   | - 0.48              | - 0.41              | 0.7283                    |

*In vitro* binding of LEF1 protein to 8-mer oligonucleotides was measured using protein-binding microarrays as previously described<sup>38</sup>. Z-scores for the indicated LEF1-oligonucleotide interactions are shown for two independent experiments, along with the P-value for the combined results. Oligonucleotides with the ancestral A sequence at the position of the rs12821256 polymorphism (underlined) show significant binding interaction with LEF1 protein (P=0.0024). In contrast, oligonucleotides with the blond-associated G variant at this position do not show significant binding. All data are from the UniPROBE database<sup>39</sup>, and are organized here for their relevance to the human rs12821256 polymorphism.



## Supplementary Table 2. Primers

| Primers          | Sequence 5'-3'                                                                                                                                 | Assay/Clone               | Size   |
|------------------|------------------------------------------------------------------------------------------------------------------------------------------------|---------------------------|--------|
| Kg1514<br>Kg1521 | GGATTGCGGCCGCTACTCCTTCTTATTGCTCTCTCTGTGG<br>CAAAAAGAGTCCAGGACCAGACGGA                                                                          | H1 partial                | 4.7 kb |
| Kg1025<br>Kg1026 | GGATTGCGGCCGCTAATAGGGAACATAGAACACATGGAAG<br>GGATTGCGGCCGCTATGATTGCTCATTGACTGTGGTCCG                                                            | H2                        | 6.2 kb |
| Kg1516<br>Kg1517 | GGATTGCGGCCGCTAGAAACGACCACAGTGTCAATGAGCA<br>GGATTGCGGCCGCTATTAATGGTGCCAGCATCCGTCAGT                                                            | H3                        | 3.1 kb |
| Kg1116<br>Kg1117 | GGATTGCGGCCGCTATGCTTATATCCAGTTAAGGCTTTGGC<br>GGATTGCGGCCGCTAAGGTACCTTTGCTTCTCGTGGGTCA                                                          | HFE-lacZ                  | 1.9 kb |
| Kg1119<br>Kg1120 | GGATTGCGGCCGCTAAGGCAAAGGACAAACTCCCTGGAGA<br>GGATTGCGGCCGCTAATCCAGAGCAGTATACCTCAAGGTG                                                           | H2b                       | 1.5 kb |
| Kg1025<br>Kg1146 | see above<br>TAGGGTTTTTGGCCGTAGTAACATGCCCTTGCT                                                                                                 | H2del1                    | 2.3 kb |
| Kg1147<br>Kg1026 | TTACTACGGCAAAAACCCTAAACACAGAGCT<br>see above                                                                                                   | H2del2                    | 4.4 kb |
| Kg1143<br>Kg1144 | AGGATTACTCGAGTATGCTTATATCCAGTTAAGGCTTTGGC<br>AGGATTACTCGAGTAAGGTACCTTTGCTTCTCGTGGGTCA                                                          | HFE-luciferase            | 1.9 kb |
| Kg1143<br>Kg1146 | see above<br>see above                                                                                                                         | HFEdel1                   | 1.5 kb |
| Kg1147<br>Kg1144 | see above<br>see above                                                                                                                         | HFEdel2                   | 384 bp |
| Kg1155<br>Kg1156 | GTACCCTCGAGCGACACTAAAGGAGGTAACACTAAAGGAGGTAACACTAAAGGAGCGCGACACTAAAGG<br>TAGATCTCGAGAATCCTTTAGTGTTACCTCCTTTAGTGTTACCTCCTTTAGTGTTACCTCCTTTAGTGT | 7X ANC                    | 112 bp |
| Kg1157<br>Kg1158 | GTACCCTCGAGCGACGCTAAAGGAGGTAACGCTAAAGGAGGTAACGCTAAAGGAGCGCGACGCTAAAGG<br>TAGATCTCGAGAATCCTTTAGCGTTACCTCCTTTAGCGTTACCTCCTTTAGCGTTACCTCCTTTAGCGT | 7X BLD                    | 112 bp |
| Kg1133<br>Kg1134 | TAGGATCGAGCTCTAGACGATGTAGGTCACGGTCTCGAAG<br>TAGGATCGAGCTCTAACATGCCCGCCGTGACCGTCGAGAA                                                           | attB                      | 278 bp |
| Kg1135<br>Kg1136 | CACTATAGGGCGAATTGGAGCTCCA<br>TCTTCTCATGGCGCCGCGCTCTGCTTCTGGA                                                                                   | hsp68                     | 941 bp |
| Kg1137<br>Kg1138 | GCGCGGCCCATGAAGAAGACACAACTTGA<br>CCGGTTATTATTACACCTCTTGAAATTCTCTC                                                                              | Kitlg                     | 822 bp |
| Kg1139<br>Kg1140 | AGAGGTGTAATAATAACCGGGCAGGGGGGATCTAA<br>CACACAGGAAACAGCTATGACCATG                                                                               | SV40pA                    | 432 bp |
| Kg1118<br>Kg1117 | GGATTGCGGCCGCTATGGGTAGGAGTGAGGAAAATGGCTA<br>see above                                                                                          | HE-Kitlg                  | 864 bp |
| Kg1576           | GCCATTTTCCTCACTCCTACCC                                                                                                                         | Kitlg SSI genotyping      |        |
| Kg1580           | GACACAAACTTGGATTATCACTTGCA                                                                                                                     | Kitlg genotyping/ RT-QPCR |        |
| Kg1581           | GTTGAGGGTTATCATATAGTCATTTGG                                                                                                                    | Kitlg genotyping/ RT-QPCR |        |
| Kg1588           | ACAGCTTCTTGCAGCTCCTT                                                                                                                           | Actb RT-QPCR              |        |
| Kg1589           | ATAGGAGTCCTTCTGACCCAT                                                                                                                          | Actb RT-QPCR              |        |

## Additional References

48. Wehrle-Haller, B., Morrison-Graham, K. & Weston, J.A. Ectopic c-kit expression affects the fate of melanocyte precursors in Patch mutant embryos. *Dev. Biol.* **177**, 463-74 (1996).
49. Kunisada, T. *et al.* Transgene expression of steel factor in the basal layer of epidermis promotes survival, proliferation, differentiation and migration of melanocyte precursors. *Development* **125**, 2915-2923 (1998).
